# 1 Exploring social determinants of childhood vaccination based on the 2 National Immunization Surveys Data

3 Felix M. Pabon-Rodriguez<sup>1\*</sup> 

4 <sup>1</sup>Department of Biostatistics and Health Data Science, Indiana University School of Medicine, Indianapolis,  
5 Indiana, United States

6 \*Corresponding author

7 Email: [fpabonrodriguez@gmail.com](mailto:fpabonrodriguez@gmail.com)

8  <https://orcid.org/0000-0003-3528-2354>

## 9 Abstract

10 Ensuring children receive vaccinations is essential for their health and community well-being, preventing serious  
11 diseases and fostering overall immunity. Nevertheless, the impact of social determinants of health on vaccination  
12 access underscores the urgent need for targeted interventions to address disparities and ensure equitable  
13 healthcare delivery for all children. This study investigates the impact of several social determinants on childhood  
14 vaccination in the United States using data from the National Immunization Surveys from 2010-2022. As a simple  
15 approach, ordinal logistic mixed-effect models is used to analyze vaccination patterns among children aged 19–  
16 35 months as reported by parents or guardians. The study findings highlight associations between vaccination  
17 and key social factors, including the child’s age group, parents’ or guardians’ education level, and vaccination  
18 awareness due to the child being the firstborn. The results from this basic study provide insights into the nuanced  
19 relationships that influence vaccination practices.  
20

## 21 KEYWORDS:

22 social determinants of health, vaccination, health services, ordinal logistic regression  
23

## 24 1. INTRODUCTION

25 Childhood vaccination programs have played a pivotal role in public health by significantly reducing the burden of  
26 vaccine-preventable diseases worldwide [1]. Vaccinations during early childhood are crucial for protecting  
27 individuals against a myriad of infectious diseases, thereby contributing to the overall well-being of children and  
28 communities. Despite the remarkable success of vaccination initiatives, achieving optimal vaccination coverage  
29 remains a persistent challenge, particularly due to emerging infectious threats and vaccine hesitancy concerns  
30 [2]. Understanding the factors influencing vaccination uptake is essential for devising targeted interventions and  
31 policies aimed at promoting equitable access to vaccines and sustaining high vaccination coverage rates [3].  
32

33 Social determinants of health (SDoH) have garnered increasing attention in recent years as critical factors of  
34 health outcomes and healthcare utilization [4,5]. These determinants, encompassing socioeconomic status,  
35 education, employment, housing, social support networks, cultural norms, and healthcare access, have effects on  
36 vaccination behavior and coverage rates [6,7]. Disparities in vaccination coverage persist among different  
37 demographic groups, highlighting the intricate interplay between socioeconomic factors and vaccine accessibility  
38 [8]. Furthermore, the impact of SDoH on vaccination decisions extends beyond individual-level factors to  
39 encompass broader societal and structural determinants, underscoring the multifaceted nature of vaccination  
40 disparities [9,10]. These SDoH influence health behaviors, healthcare utilization patterns, and overall health  
41 status, shaping health outcomes across the lifespan [11-13].  
42

43 By recognizing the impact of SDoH on health outcomes, researchers can develop more comprehensive and  
44 holistic approaches to health promotion and disease prevention. Addressing disparities in SDoH not only  
45 mitigates health inequities but also enhances the effectiveness of healthcare interventions and health policies  
46 [14,15]. Moreover, integrating SDoH into health research enables the identification of modifiable risk factors and  
47 the development of targeted interventions to address underlying social determinants, thereby promoting health  
48 equity and improving population health outcomes [12,13,16]. Incorporating SDoH into health research also  
49

50 emphasizes the importance of adopting an interdisciplinary and collaborative approach to address complex health  
51 challenges. Collaborations between researchers, policymakers, healthcare providers, community organizations,  
52 and other stakeholders are essential for implementing multifaceted interventions that target the root causes of  
53 health disparities and promote health equity [17,18].

54  
55 This work presents a simple analysis examining the relationship between SDoH and childhood vaccination using  
56 data from the National Immunization Surveys. The study aims to identify potential influences of various SDoH,  
57 such as socioeconomic status, education, and geographic location, on the reported number of vaccinations  
58 among children aged 19-35 months, and how these associations change over time. An ordinal logistic mixed-  
59 effects model is employed to investigate how these social factors affect vaccination, considering the ordinal  
60 nature of the vaccination variables (0, 1, 2, 3+ vaccinations). The findings are expected to provide insights into the  
61 interplay between social determinants and childhood vaccination patterns, aiming to inform targeted interventions  
62 to improve vaccination uptake and address disparities in immunization.

63

## 64 **2. MATERIALS AND METHODS**

65

### 66 **2.1. Data**

67 The National Immunization Surveys (NIS) for Children (NIS-Child) focuses on children aged 19-35 months  
68 residing in the United States, capturing a representative sample of this population for vaccination coverage  
69 assessment. The data collected serve as a crucial tool in monitoring the prevalence of recommended  
70 vaccinations among 2-year-old children at national, state, and selected local levels, as well as in U.S. territories.  
71 The survey encompasses a comprehensive assessment of coverage for key vaccinations, including Diphtheria  
72 and Tetanus Toxoids and Acellular Pertussis vaccine (DTaP/DT/DTP), Poliovirus vaccine (Polio), Measles or  
73 Measles-Mumps-Rubella vaccine (MMR), Haemophilus Influenzae type b vaccine (Hib), Hepatitis B vaccine  
74 (HepB), Varicella Zoster (chickenpox) vaccine (VAR), Pneumococcal Conjugate vaccine (PCV), Rotavirus  
75 vaccine (ROT), Hepatitis A vaccine (HepA), and Influenza vaccine (Flu), leading to a total of ten (10)  
76 recommended vaccine administration by age 2, where doses vary by schedule. This study investigates the impact  
77 of several social determinants on childhood vaccination in the United States using NIS-Child data from 2010-  
78 2022.

79

#### 80 **2.1.1. Social Determinants of Health**

81 While the primary objective of the survey is to assess immunization status, it inherently reflects several social  
82 determinants of health (SDoH) that could influence vaccination patterns. Demographic information, including  
83 socioeconomic status such as income and education levels, is implicitly embedded in the data and may influence  
84 access to healthcare services, including vaccinations. Additionally, the survey's multi-level approach, collecting  
85 data at national, state, and selected local levels, provides insights into potential geographic and regional  
86 disparities in vaccination coverage. Furthermore, the inclusion of demographic variables like race and ethnicity  
87 offers a glimpse into disparities that may exist among different racial and ethnic groups. Indirect indicators of  
88 healthcare access, such as health insurance coverage and the availability of healthcare facilities, can be inferred  
89 from the dataset. Moreover, maternal and child health practices, encompassing factors like breastfeeding and  
90 prenatal care, may indirectly impact the likelihood of children receiving recommended vaccinations. While the  
91 NIS-Child primarily focuses on vaccination coverage, it offers a valuable lens through which researchers can  
92 explore the intersection of immunization and various SDoH, contributing to a more comprehensive understanding  
93 of public health dynamics among young children, which is exactly the focus of this study.

94

#### 95 **2.1.2. Health Outcome**

96 For this study, the number of vaccines received by the child is used as the health outcome of interest. It is  
97 important to note that this number can vary based on various factors, including parental choices, access to  
98 healthcare, and adherence to vaccination schedules. According to data from the NIS, coverage rates for  
99 recommended vaccinations among children by age 2 are regularly assessed. Thus, NIS aims to capture the  
100 percentage of children who have received specific vaccines according to the recommended schedules. In  
101 addition, parents' reports are a critical component of assessing vaccine coverage, but it is also important to note

102 that the accuracy of these reports can be influenced by factors such as recall bias, understanding of vaccine  
 103 schedules, and other individual or cultural considerations. Public health initiatives often emphasize the importance  
 104 of accurate reporting and maintaining up-to-date immunization records. To facilitate the understanding and  
 105 interpretation of the model being implemented and the results obtained, a categorical variable (with name  
 106 *vaccination group* and denoted by  $V$ ) is constructed to represent the grouped number of vaccinations reported by  
 107 parents or guardians. The variable is constructed as shown in Equation 1, where  $i$  represents a child aged 19-35  
 108 months and  $t$  the survey year.

$$V_{i,t} = \begin{cases} 0, & \text{if 0 vaccinations reported} \\ 1, & \text{if 1 vaccinations reported} \\ 2, & \text{if 2 vaccinations reported} \\ 3+, & \text{if 3+ vaccinations reported} \end{cases} \quad (1)$$

109  
 110 **2.2. Analysis**

111 The ordinal logistic mixed-effects model expresses the cumulative probability of an ordinal response variable,  $V$   
 112 as previously described, being in or below category  $j$ . The model is defined as follows (Equation 2).

$$P(V \leq j) = \frac{1}{1 + \exp(-(\alpha_j + b_1 + b_2 + \beta_1 X_1 + \beta_2 X_2 + \dots + \beta_k X_k))} \quad (2)$$

113 Here,  $V$  is the ordinal response variable,  $X_1, X_2, \dots, X_k$  are the SDoH of interest,  $\alpha_j$  is the intercept of the cumulative  
 114 log-odds at category  $j$ ,  $b_1$  is the random effect for census region,  $b_2$  a random effect for year, and  $\beta_1, \beta_2, \dots, \beta_k$  are  
 115 the estimated coefficients for the SDoH of interest. This model estimates the cumulative probability of being in or  
 116 below category  $j$  based on the values of the SDoH of interest. The logistic function  $\frac{1}{1 + \exp(-z)}$ , shown in the  
 117 right-hand side of the previous equation, is used to transform the linear combination of predictors into a  
 118 probability. The coefficients  $\beta_1, \beta_2, \dots, \beta_k$  represent the impact of each predictor variable on the log-odds of the  
 119 ordinal response variable. A positive coefficient indicates an increase in the log-odds, while a negative coefficient  
 120 indicates a decrease. The intercepts  $\alpha_j$  represent the cumulative log odds at the baseline level (category 0) and  
 121 each subsequent category. They determine the starting point of the cumulative probabilities for each category.  
 122 This model can be applied to investigate the influence of predictor variables on the probabilities of different  
 123 categories. The model can also be written in its log-odds format as shown in Equation 3.

$$\text{logit}(P(V \leq j)) = \log\left(\frac{P(V \leq j)}{1 - P(V \leq j)}\right) = \alpha_j + b_1 + b_2 + \beta_1 X_1 + \beta_2 X_2 + \dots + \beta_k X_k \quad (3)$$

125  
 126 **3. RESULTS**

127 The goal of this study lies primarily in the assessment of the impact of several the social determinants of health on  
 128 vaccination coverage by looking at their statistical significance and how this impact has changed over time from  
 129 2010 to 2022. Tables 1 provides the definition of the SDoH of interest for this study. To help readers with  
 130 knowledge with the NIS-Child datasets, this table uses the same names (labels) as described on the website.  
 131 Figure 1 shows the number of children being vaccinated over time, where the 30-35 months category always  
 132 shows greater coverage compared to the other groups. This graph also shows that coverage trajectories are very  
 133 similar for the first two age groups.  
 134

135 *Figure 1. Number of children per year in each age group over the 2010-2022 period.*

136 If we look at the census region (Figure 2), the number of 3+ vaccinations is lower compared to other categories.  
 137 The South region shows the highest number of vaccinated children with 1 or 2 types. Missing values are affecting  
 138 these trajectories, as shown in the last plot of Figure 2. When looking at the Hispanic origins of the children  
 139 (Figure 3), more children from non-Hispanic origins showed higher numbers of vaccines from 2010 to 2022. The  
 140 poverty-to-income ratio is the ratio between the total income of the children's family and the poverty threshold. A  
 141 ratio of less than 1 means the income is below the poverty level, 1 means the income and poverty level are the  
 142 same, and greater than 1 means the income is above the poverty level. From the data, we found that poverty-to-

143 income ratio patterns look similar over time (Figure 4), with a higher density above the poverty level, but a  
 144 noticeable peak below 1 is of concern as well.

145  
 146

*Table 1. Definition of the SDoH variables of interest.*

| Variable   | Definition                                                     |
|------------|----------------------------------------------------------------|
| D6R        | Number of vaccination providers identified by respondent       |
| YEAR       | Year of interview                                              |
| CEN_REG    | Census region based on true state of residence                 |
| AGEGRP     | Age category of children (19-23, 24-29, 30-35 months)          |
| C1R        | Number of people in household                                  |
| CBF_01     | Was the child ever breastfed or fed breast milk?               |
| CWIC_02    | Is the child currently receiving WIC benefits?                 |
| EDUC1      | Education of mother categories                                 |
| FRSTBRN    | First born status of child                                     |
| I_HISP_K   | Hispanic origin of child                                       |
| INCPORAR   | Income to poverty ratio                                        |
| LANGUAGE   | Language in which interview was conducted                      |
| M_AGEGRP   | Age of mother categories                                       |
| MARITAL2   | Marital status of mother                                       |
| RACE_K     | Race of child                                                  |
| RACEETHK   | Race/ethnicity of child                                        |
| SEX        | Gender of child                                                |
| INS_STAT_I | Was the child not covered by any health insurance at any time? |

147  
 148

149 *Figure 2. Number of children per year at each vaccination group and census region over the 2010-2022 period.*  
 150 *The 'NA' plotting area is used to allocate children with missing census regions, and the 'NA' in the legend*  
 151 *corresponds to missing information about vaccination. The joint 'NA-NA' pattern in the last plot correspond to*  
 152 *counts with both missing census region and missing vaccination information.*

153  
 154

*Figure 3. Number of children from Hispanic origins that have received vaccinations.*

155  
 156  
 157  
 158

*Figure 4. Income to Poverty Ratio per Year. The poverty-to-income ratio is the ratio of a family's total income divided by its poverty threshold. A ratio of less than 1 means the income is below the poverty level, 1 means the income and poverty level are the same, and greater than 1 means the income is above the poverty level.*

159 Figure 5 illustrates the number of children covered by health insurance. From this plot, we see that the number of  
 160 missing information regarding health insurance coverage has increased dramatically since 2010. While the  
 161 number of children covered by health insurance is steadily high compared to the group of children not covered by  
 162 health insurance, the issue of missing information is worrisome. To explore the initial associations between each  
 163 considered SDoH and childhood vaccination coverage, we also conducted a Fisher exact test to assess the  
 164 significance of these associations via contingency tables formed between the outcome and the factor without  
 165 considering the other variables. From this, the study suggests that in each year from 2010 to 2022, the age group  
 166 and Hispanic origins of the children, education level, and language of the parent or guardian, and if the child is  
 167 firstborn, are statistically associated with the vaccination status at the 5% significance level.

168  
 169

*Figure 5. Number of children from covered by any health insurance.*

170

171

172

### 173 3.1. Year-specific models

174 The first analysis uses Equation 1 with all covariates of interests and a random effect for census region. This  
175 model revealed some significant associations between SDoH variables and childhood vaccination. Figure 6  
176 illustrates the statistical significance over time of various factors with the vaccination group. The red and blue  
177 colors represent if the odds ratios are greater than 1 or not (red = no, blue = yes). In the x-axis, we look at the  
178 significance level of the predictor, with names shown in the y-axis. Value 0 means it is not significant, while 1  
179 means it is statistically significant. Several SDoH factors significantly influence childhood vaccination behavior.  
180 Specifically, the child's age group, parents' or guardians' education level, vaccination awareness due to the child  
181 being the firstborn, and the income-to-poverty ratio were found to be significant predictors of vaccination coverage  
182 among children aged 19-35 months. Overall, these findings underscore the importance of addressing social  
183 determinants such as education and awareness programs in promoting childhood vaccination and reducing  
184 disparities in immunization rates.

185

186 *Figure 6. Statistical summary of the year-specific model. The red and blue colors represent whether the odds*  
187 *ratios are greater than 1 or not (red = no, blue = yes). In the x-axis, we look at the significance level of the*  
188 *predictor, with names shown in the y-axis. Value 0 means the factor is not significant, while 1 means it is*  
189 *statistically significant.*

### 190 3.2. Full ordinal logistic mixed-effects model

191 In this second model, both random effects for census region and year were included. Among factors that were  
192 flagged as positively associated with increased vaccination, we have both older age groups (24-29 months, 30-35  
193 months) of the children, the group of children who were breastfed or fed with breast milk, higher education in the  
194 mothers, first born child, and Spanish-speaking mothers. All these factors were statistically associated with  
195 increased vaccination group membership at the 5% level. On the other hand, among the SDoH factors associated  
196 with a decreased vaccination, we have children with Hispanic origin, higher income to poverty ratio, group of  
197 mothers older than 30 years old, mother who lives with a partner, children from the Hispanic Black group,  
198 indicator that children were not covered by any health insurance. All these factors were statistically associated  
199 with a decreased vaccination group membership at the 5% level. Figure 7 summarize these results.

200

201 *Figure 7. Statistical summary of the full ordinal logistic mixed effects model. The red and blue colors represent*  
202 *whether the odds ratios are greater than 1 or not (red = no, blue = yes).*

## 203 4. DISCUSSION

204 Moving forward, future research endeavors could expand upon the findings of this study to delve deeper into the  
205 mechanisms underlying the observed associations between social determinants of health and childhood  
206 vaccination. One avenue for exploration could involve longitudinal studies to track vaccination patterns over time  
207 and assess the long-term impact of SDoH on immunization rates. Additionally, qualitative research methods, such  
208 as interviews or focus groups with parents and healthcare providers, could provide valuable insights into the  
209 barriers and facilitators to vaccination uptake within different demographic groups.

210

211 Building on the identified disparities in vaccination, potential initiative implementations should aim to address the  
212 root causes of these disparities and promote health equity. Community-based interventions, such as mobile  
213 vaccination clinics or outreach programs targeting underserved populations, could improve access to vaccinations  
214 in areas with low coverage rates. Furthermore, educational campaigns tailored to specific demographic groups  
215 could enhance vaccine awareness and address misconceptions about vaccination safety and efficacy.

216

217 Incorporating technology and digital health solutions may also play a crucial role in improving vaccination  
218 coverage. Tools such as reminder systems, telehealth consultations, and mobile applications for vaccine  
219 scheduling and information dissemination could help overcome logistical barriers and increase vaccine uptake



220 among children and their families. Collaborative efforts between healthcare providers, public health agencies,  
221 community organizations, and policymakers will be essential for implementing and evaluating the effectiveness of  
222 these initiatives. Overall, future research and initiatives should prioritize strategies that promote equitable access  
223 to vaccinations while addressing the social, economic, and cultural factors that contribute to disparities in  
224 vaccination coverage. By addressing these challenges, we can work towards achieving higher vaccination rates  
225 and better overall health outcomes for children and communities.

## 226 227 **5. CONCLUSION**

228 This study reveals key social determinants impacting childhood vaccination, identifying factors like age groups,  
229 breastfeeding, maternal education, and economic conditions as crucial influences. The disparities observed  
230 underscore the urgency of developing strategies that specifically address the unique challenges encountered by  
231 vulnerable groups, including children from Hispanic and/or Black groups, uninsured families, and those  
232 experiencing economic hardship. Future initiatives should focus on enhancing accessibility through innovative  
233 approaches such as community-driven programs, digital health solutions, and culturally sensitive outreach,  
234 especially to boost vaccination coverage, ultimately advancing health equity and improving vaccination outcomes  
235 for all children.

## 236 237 **6. CONFLICT OF INTEREST**

238 The author declares that there is no conflict of interest.

## 239 240 **7. ETHICS STATEMENT**

241 The Indiana University Human Research Protection Program (HRPP) staff determined the analysis done in this  
242 study is not human subject research and, therefore, did not require further Institutional Review Board (IRB) review  
243 before conducting the study.

## 244 245 **8. DATA AVAILABILITY STATEMENT**

246 The data used for this study is sourced from the National Immunization Surveys database, available on the  
247 Centers for Disease Control and Prevention (CDC) website. Access to the dataset can be obtained from the  
248 CDC's official data repository, ensuring transparency and reproducibility in research findings.

## 249 250 **REFERENCES**

- 251 [1] Andre FE, Booy R, Bock HL, Clemens J, Datta SK, John TJ, Lee BW, Lolekha S, Peltola H, Ruff TA,  
252 Santosham M. Vaccination greatly reduces disease, disability, death and inequity worldwide. *Bulletin of the*  
253 *World health organization*. 2008;86:140-6.
- 254 [2] Dubé E, Vivion M, MacDonald NE. Vaccine hesitancy, vaccine refusal and the anti-vaccine movement:  
255 influence, impact and implications. *Expert review of vaccines*. 2015 Jan 2;14(1):99-117.
- 256 [3] Opel DJ, Taylor JA, Mangione-Smith R, Solomon C, Zhao C, Catz S, Martin D. Validity and reliability of a  
257 survey to identify vaccine-hesitant parents. *Vaccine*. 2011 Sep 2;29(38):6598-605.
- 258 [4] WHO Commission on Social Determinants of Health, World Health Organization. Closing the gap in a  
259 generation: health equity through action on the social determinants of health: Commission on Social  
260 Determinants of Health final report. World Health Organization; 2008.
- 261 [5] Solar O, Irwin A. A conceptual framework for action on the social determinants of health. WHO Document  
262 Production Services; 2010.
- 263 [6] Luman ET, Barker LE, Shaw KM, McCauley MM, Buehler JW, Pickering LK. Timeliness of childhood  
264 vaccinations in the United States: days undervaccinated and number of vaccines delayed. *Jama*. 2005  
265 Mar 9;293(10):1204-11.

- 266 [7] Larson HJ, Jarrett C, Eckersberger E, Smith DM, Paterson P. Understanding vaccine hesitancy around  
267 vaccines and vaccination from a global perspective: a systematic review of published literature, 2007–  
268 2012. *Vaccine*. 2014 Apr 17;32(19):2150-9.
- 269 [8] McDonald HI, Tessier E, White JM, Woodruff M, Knowles C, Bates C, Parry J, Walker JL, Scott JA,  
270 Smeeth L, Yarwood J. Early impact of the coronavirus disease (COVID-19) pandemic and physical  
271 distancing measures on routine childhood vaccinations in England, January to April 2020.  
272 *Eurosurveillance*. 2020 May 14;25(19):2000848.
- 273 [9] Phadke VK, Bednarczyk RA, Salmon DA, Omer SB. Association between vaccine refusal and vaccine-  
274 preventable diseases in the United States: a review of measles and pertussis. *Jama*. 2016 Mar  
275 15;315(11):1149-58.
- 276 [10] Olusanya OA, Bednarczyk RA, Davis RL, Shaban-Nejad A. Addressing parental vaccine hesitancy and  
277 other barriers to childhood/adolescent vaccination uptake during the coronavirus (COVID-19) pandemic.  
278 *Frontiers in immunology*. 2021 Mar 18;12:663074. [11] P. Braveman, S. Egerter, and D. R. Williams,  
279 “The social determinants of health: coming of age,” *Annu Rev Public Health*, vol. 32, pp. 381–398, 2011.
- 280 [12] Link BG, Phelan J. Social conditions as fundamental causes of disease. *Journal of health and social  
281 behavior*. 1995 Jan 1:80-94.
- 282 [13] Phelan JC, Link BG, Tehranifar P. Social conditions as fundamental causes of health inequalities: theory,  
283 evidence, and policy implications. *Journal of health and social behavior*. 2010 Mar;51(1\_suppl):S28-40.
- 284 [14] Graham H. Social determinants and their unequal distribution: clarifying policy understandings. *The  
285 Milbank Quarterly*. 2004 Mar;82(1):101-24.
- 286 [15] Adler NE, Stewart J. Health disparities across the lifespan: meaning, methods, and mechanisms. *Annals of  
287 the New York Academy of Sciences*. 2010 Feb;1186(1):5-23.
- 288 [16] Berkman LF, Kawachi I, Glymour MM, editors. *Social epidemiology*. Oxford University Press; 2014.
- 289 [17] Minkler M, Blackwell AG, Thompson M, Tamir H. Community-based participatory research: implications for  
290 public health funding. *American journal of public health*. 2003 Aug;93(8):1210-3.
- 291 [18] Diez Roux AV. Complex systems thinking and current impasses in health disparities research. *American  
292 journal of public health*. 2011 Sep;101(9):1627-34.
- 293

# Odds Ratios

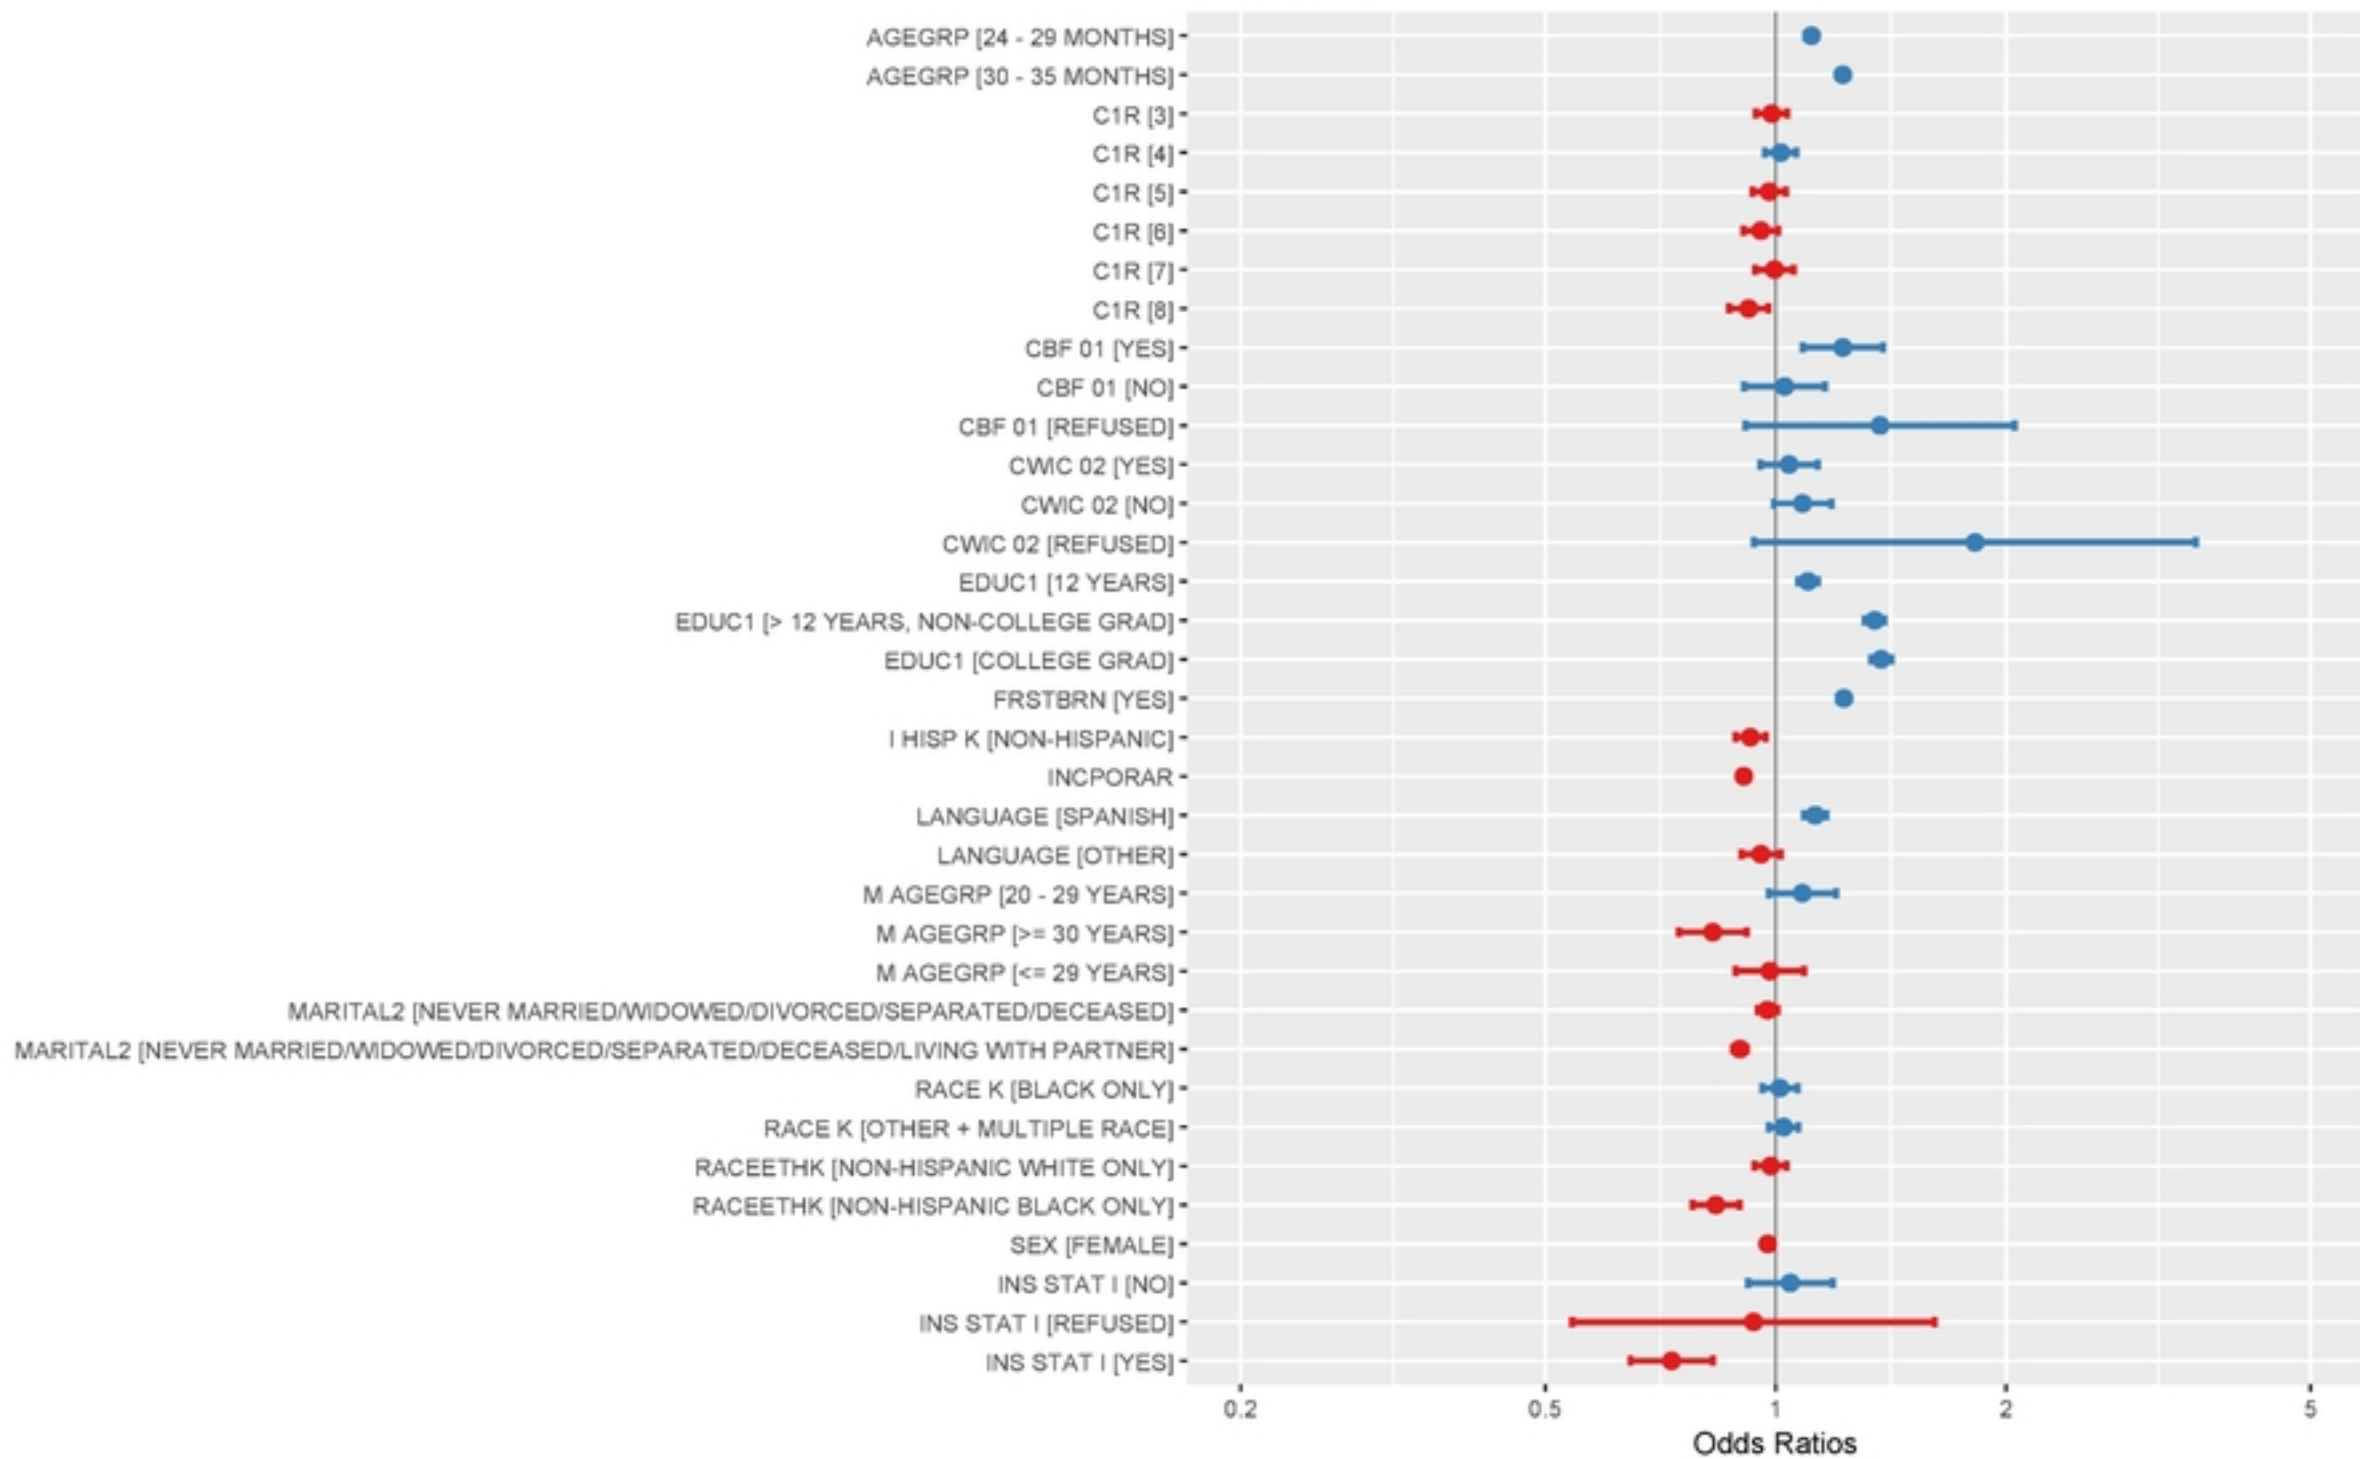

Figure 7



# Number of Children Aged 19-35 Months per Vaccination Category

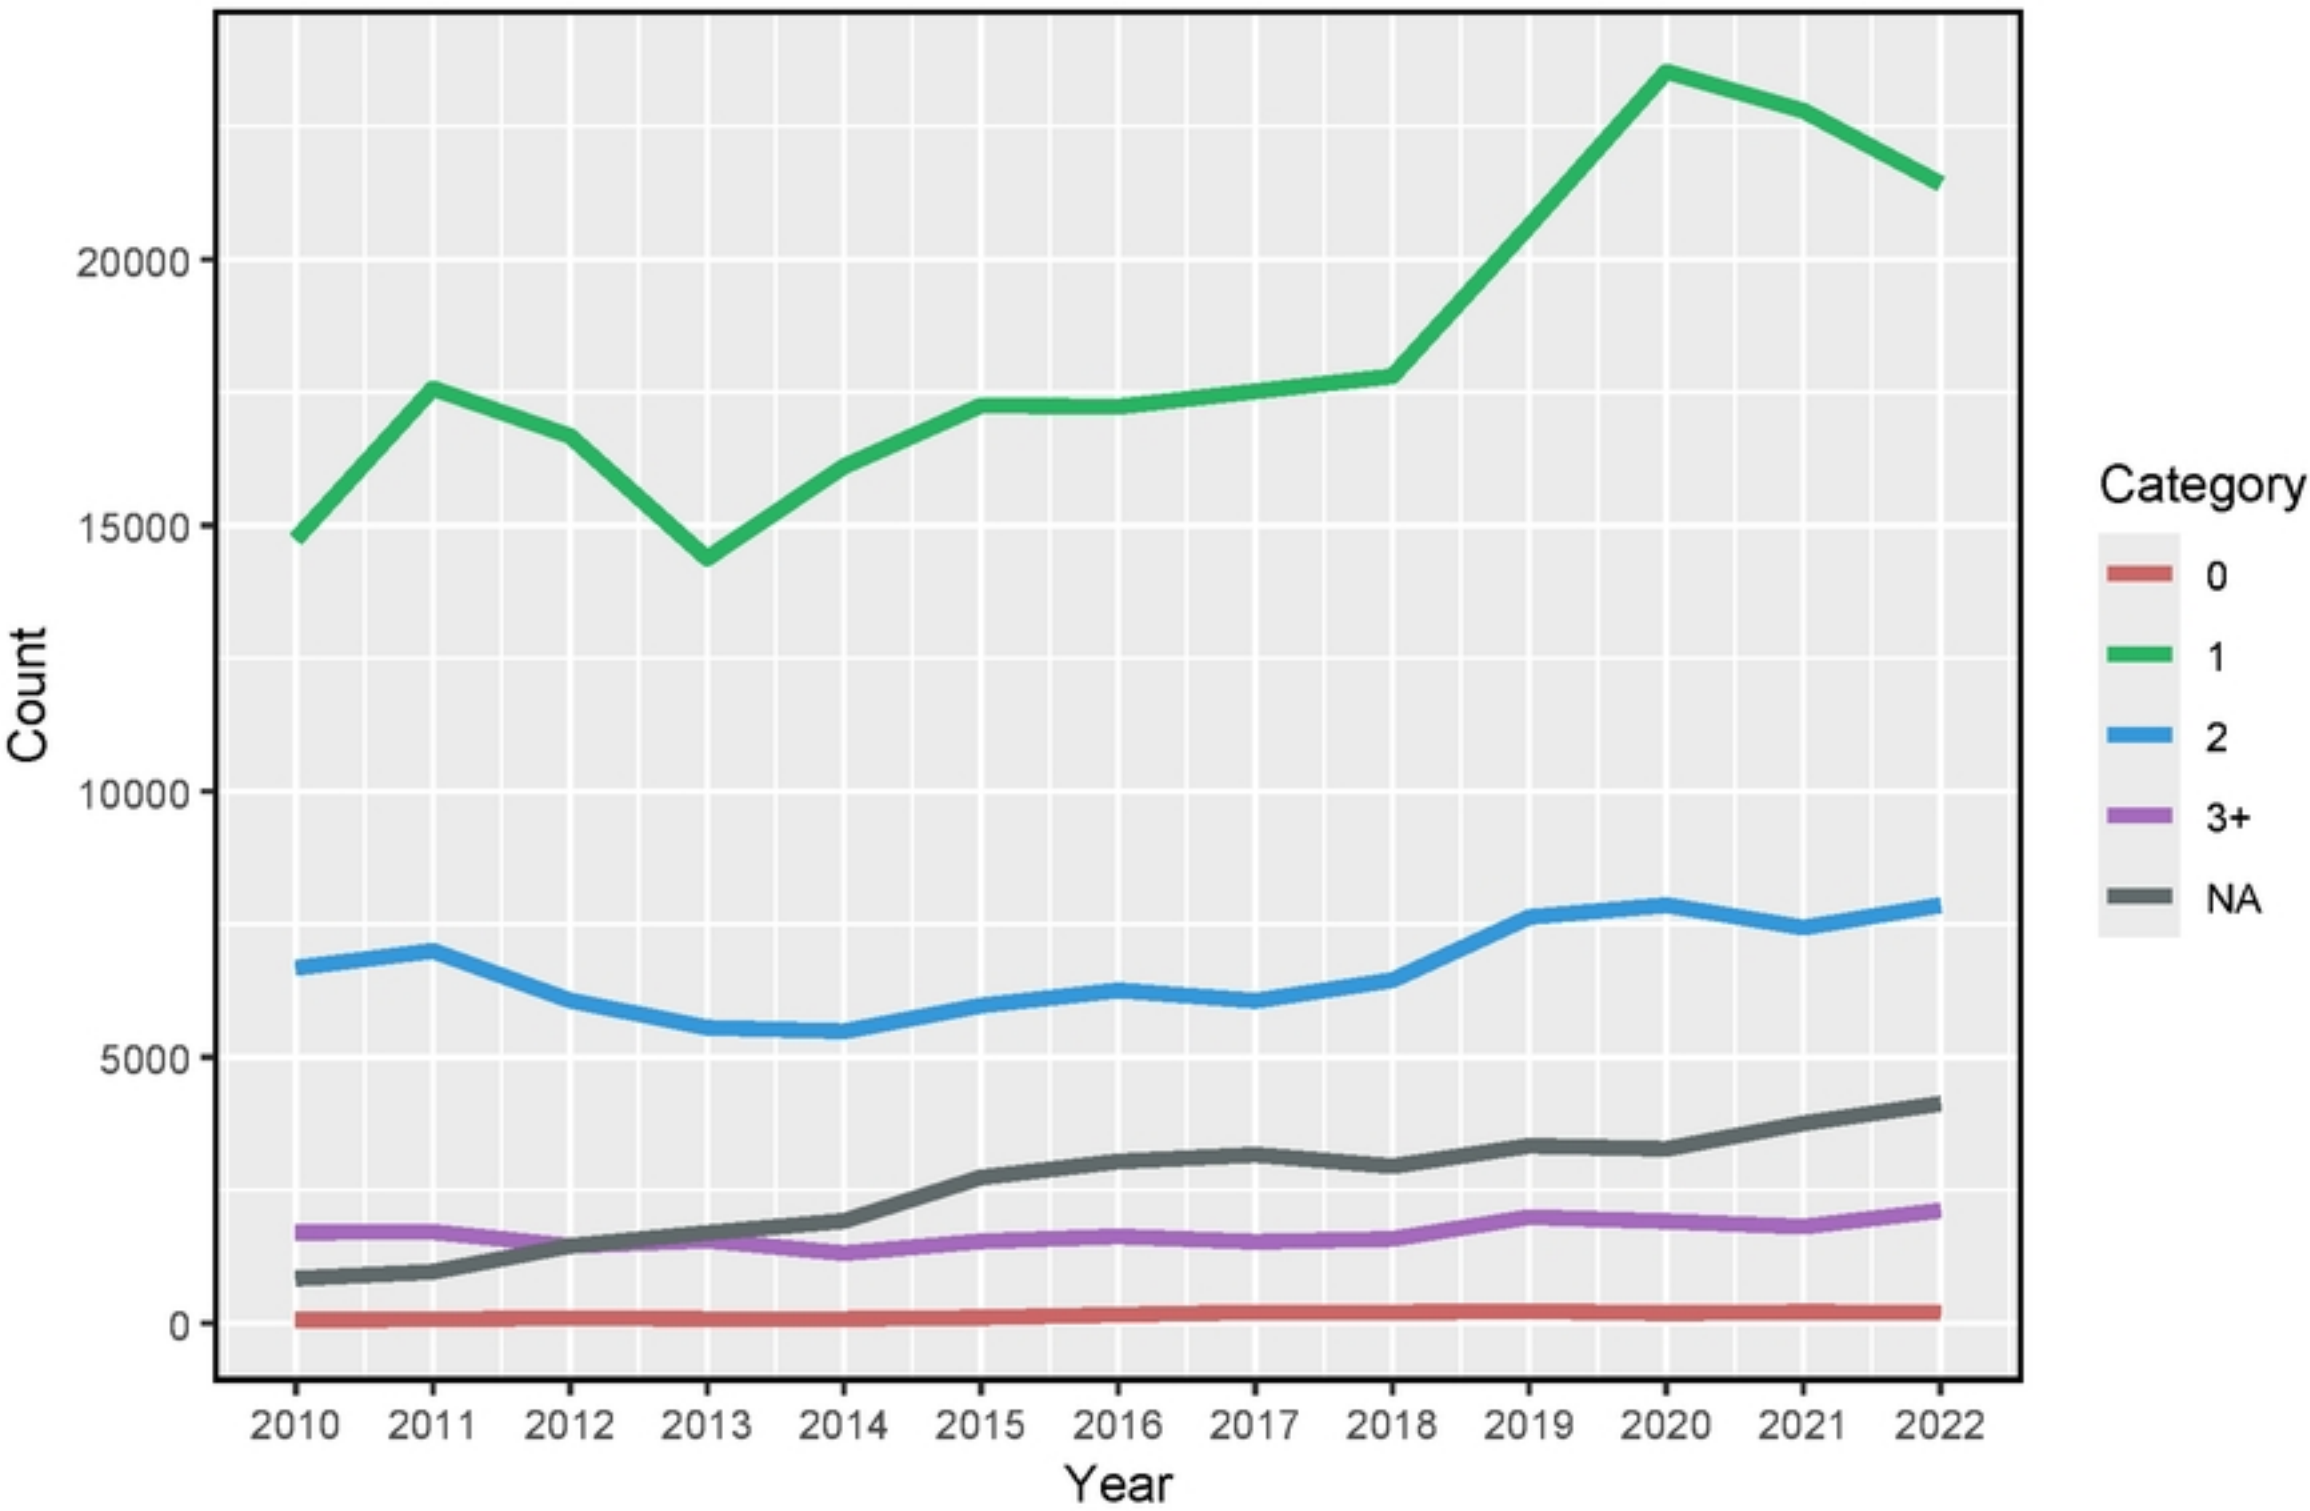

Figure 1

Number of Children Aged 19-35 Months per Vaccination Category and Census Region

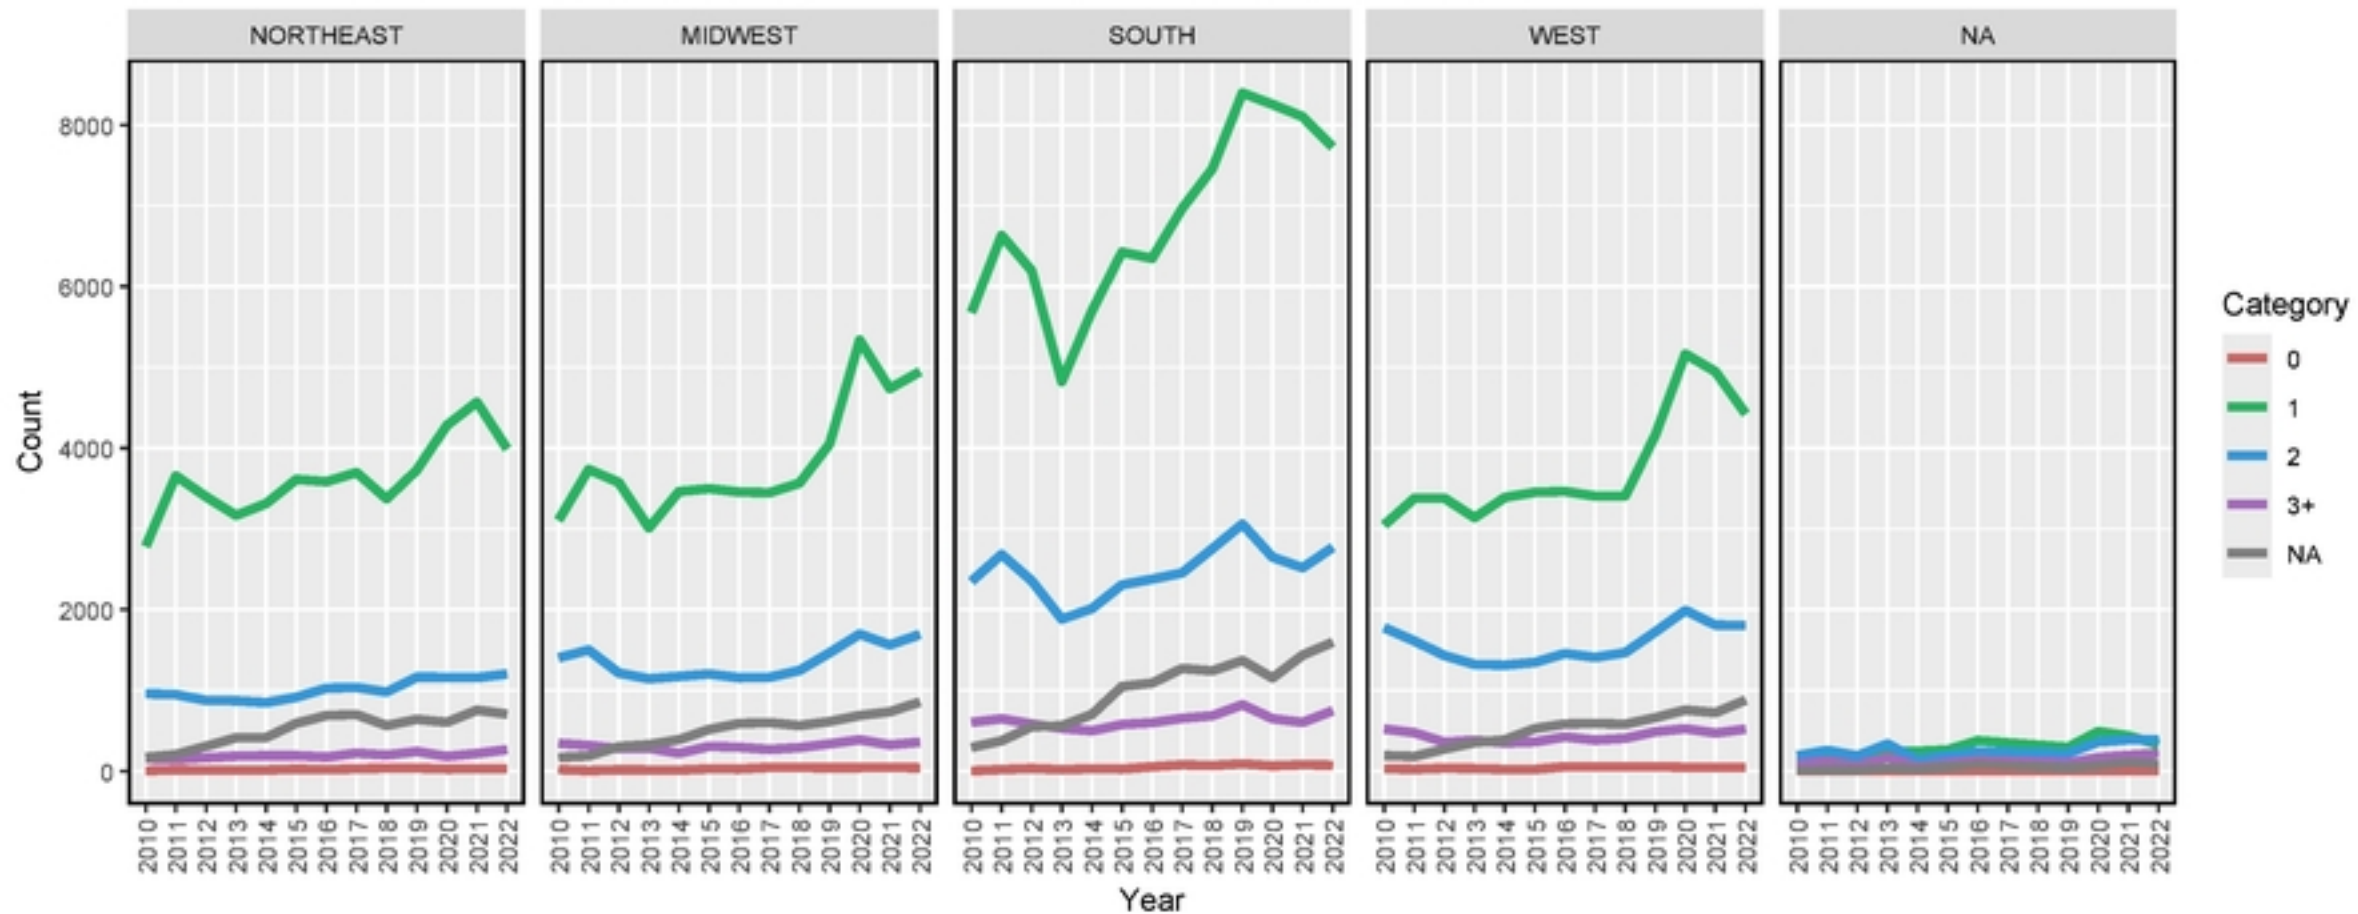

Figure 2

# Number of Children by Hispanic Origins

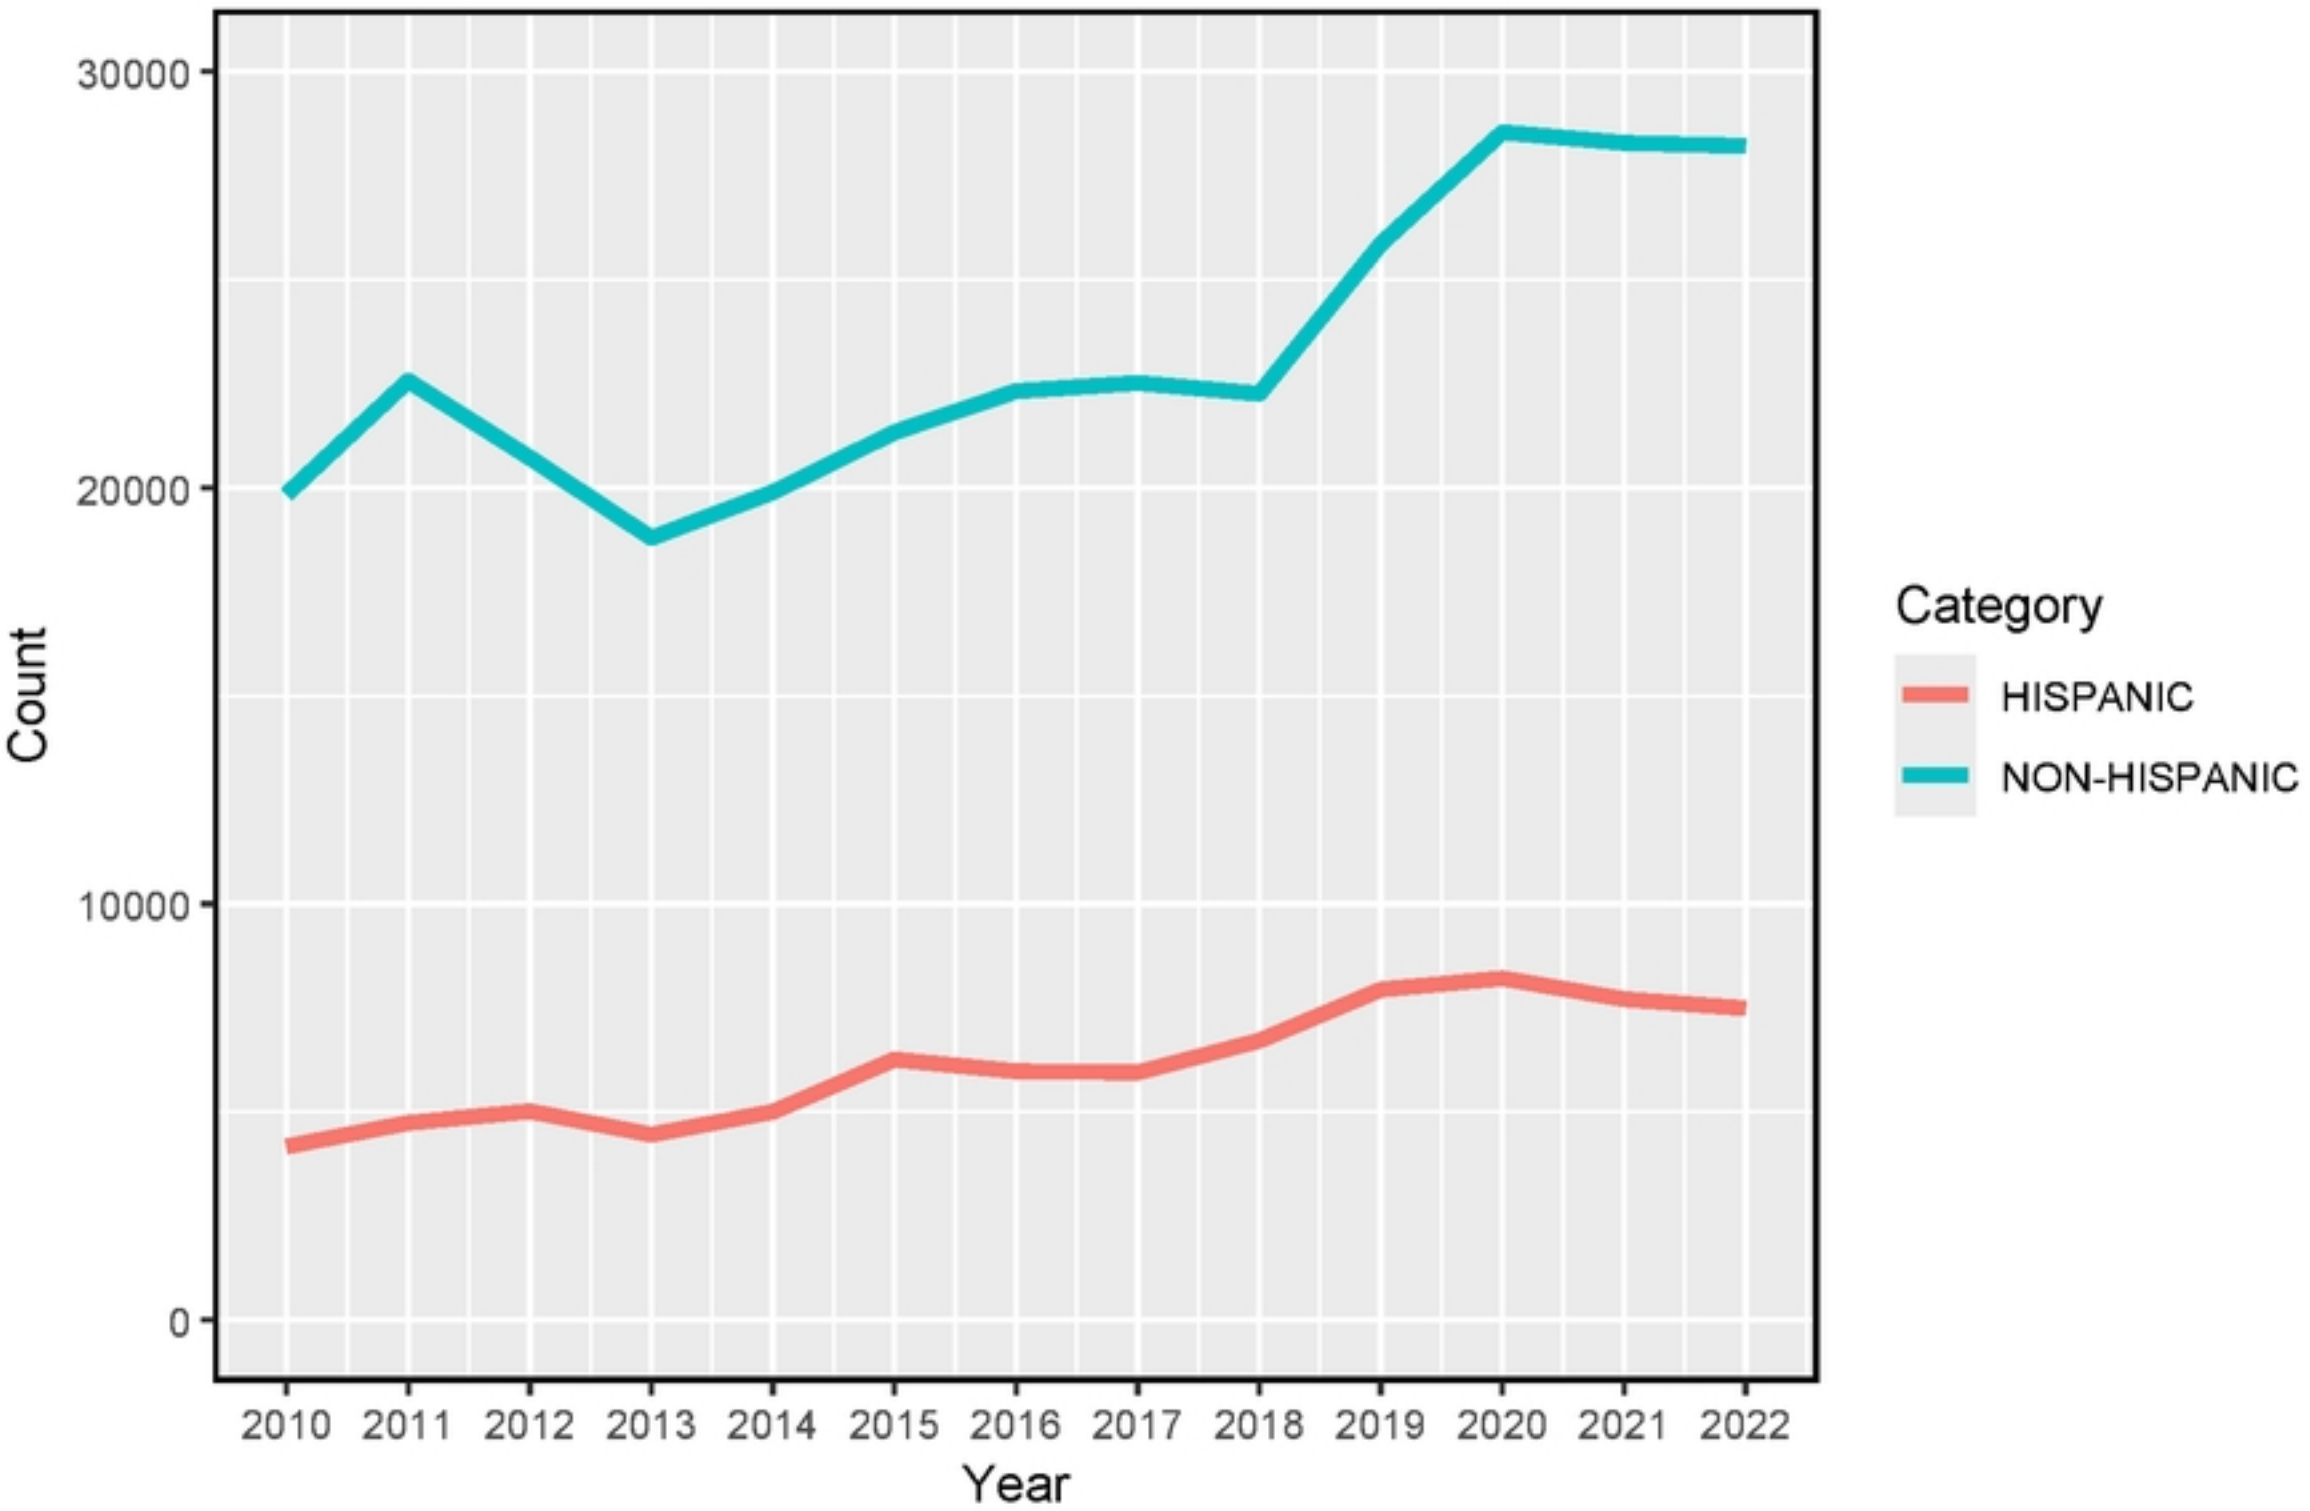

Figure 3

Distribution of Income to Poverty Ratio at the Household

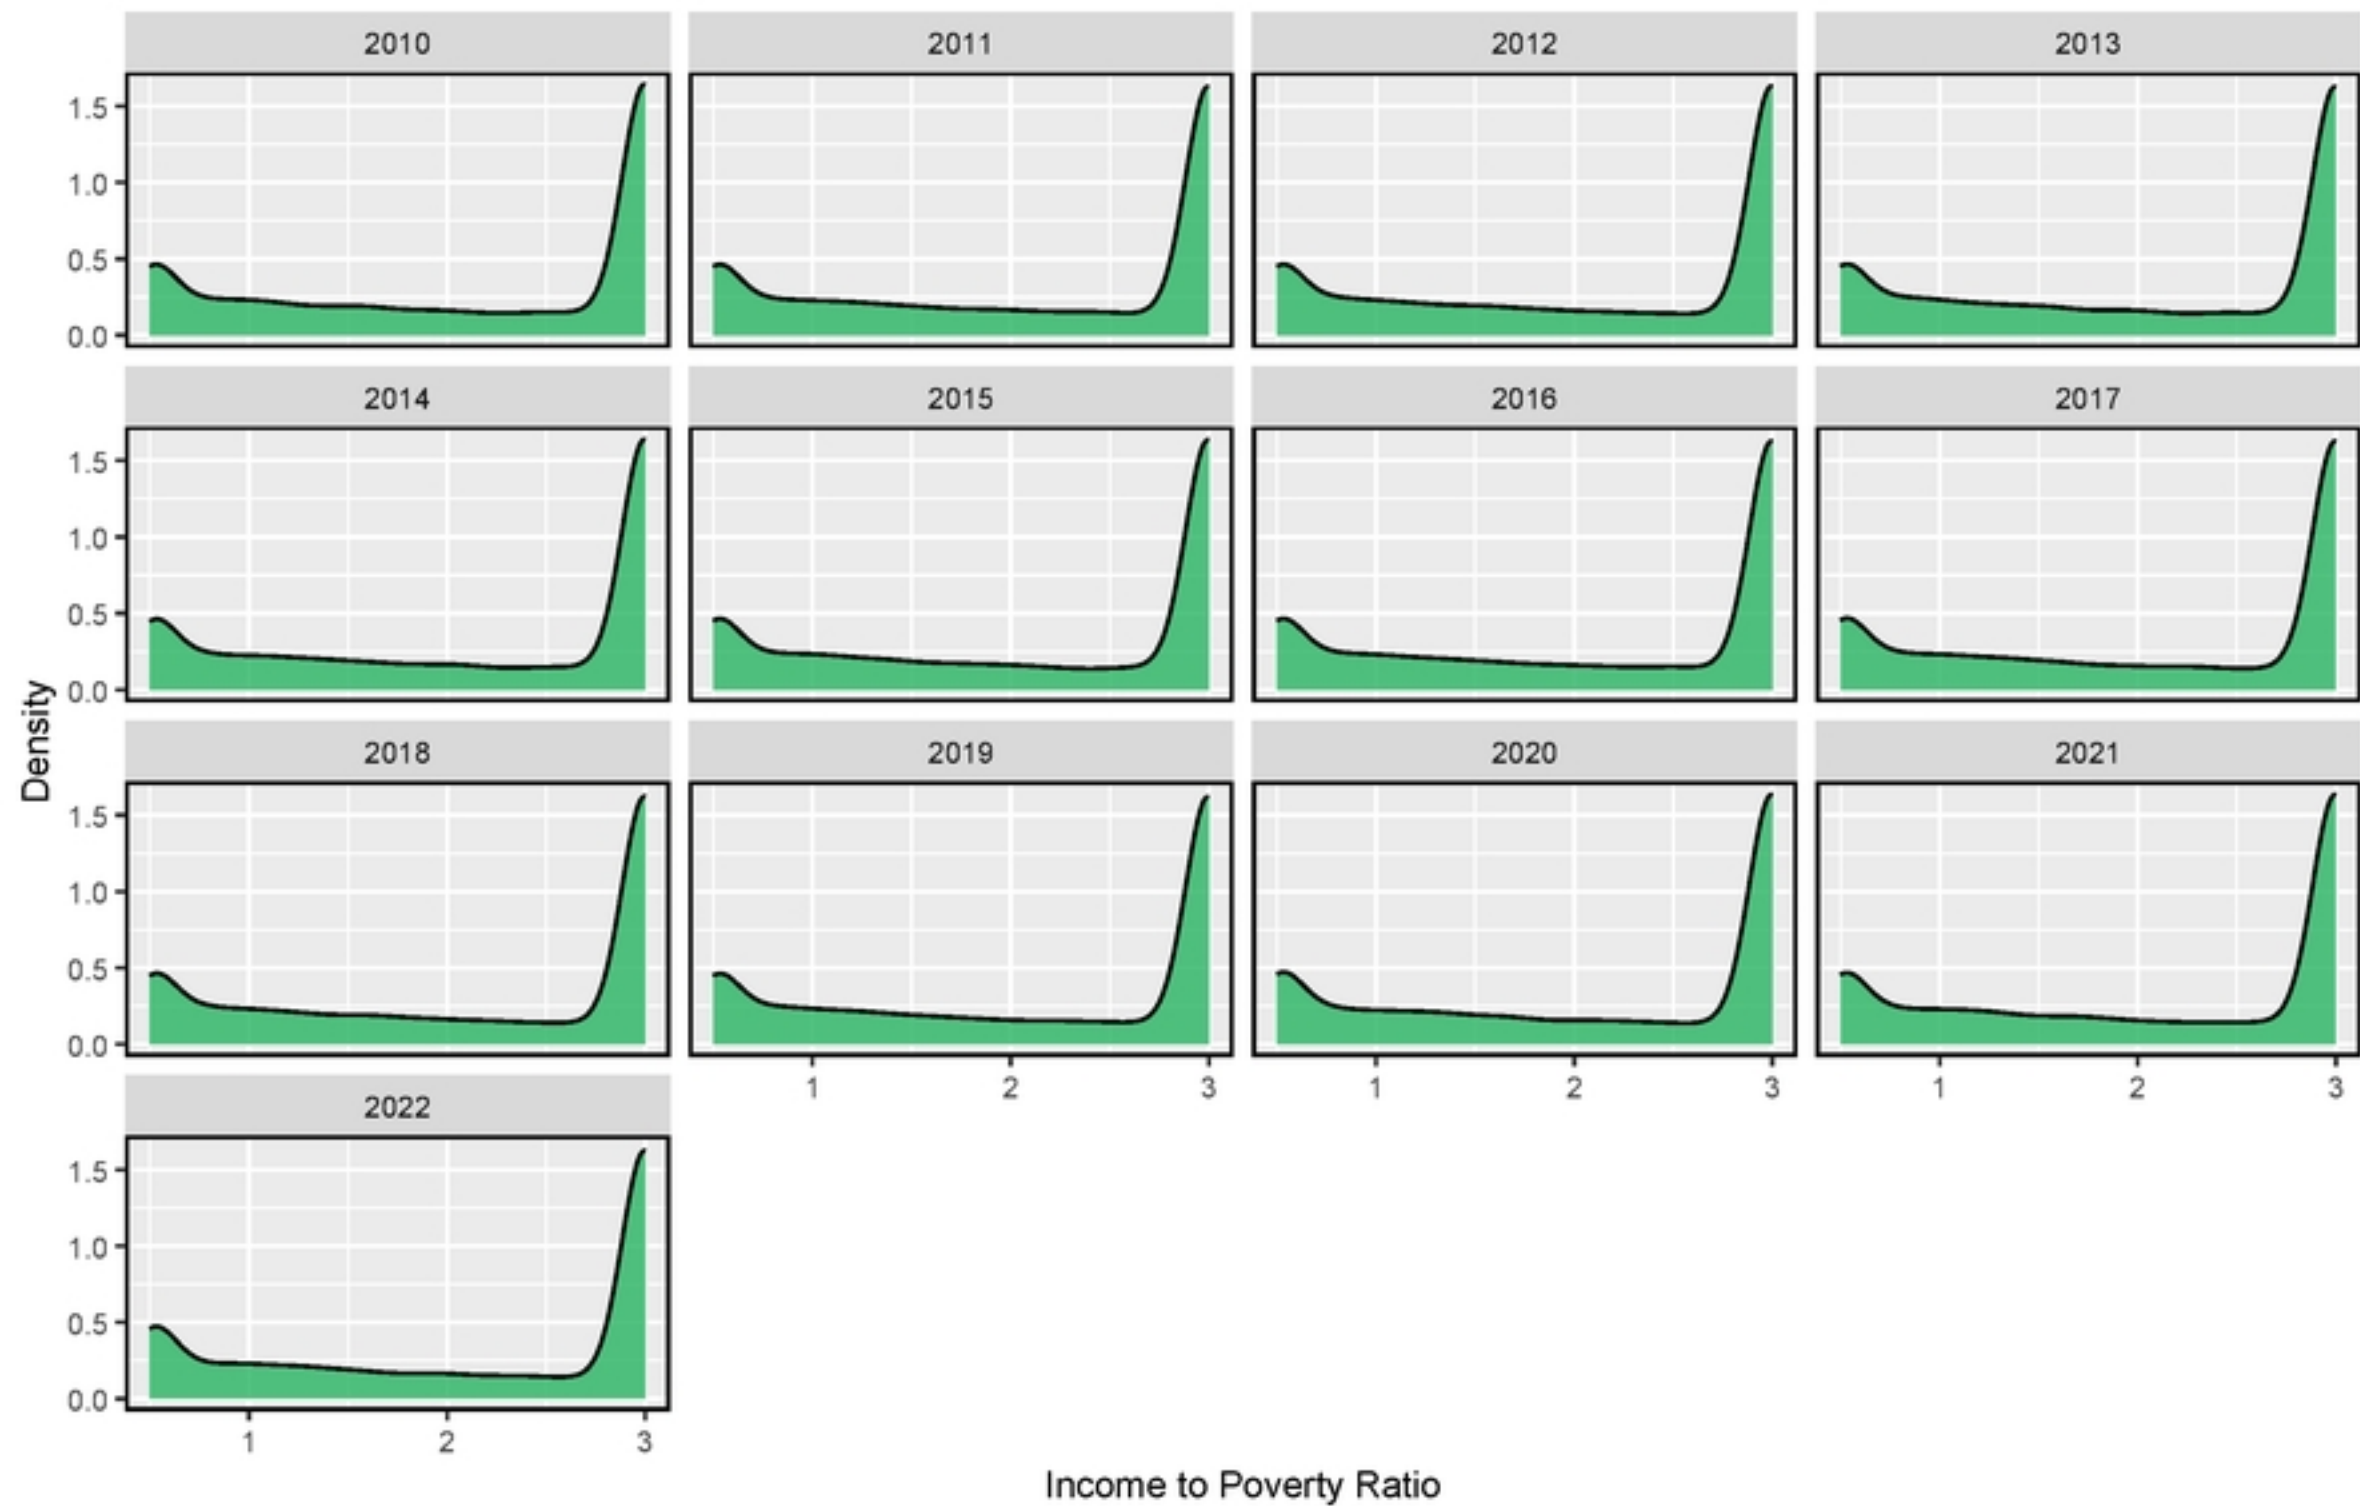

Figure 4

# Number of Children Covered by any Health Insurance

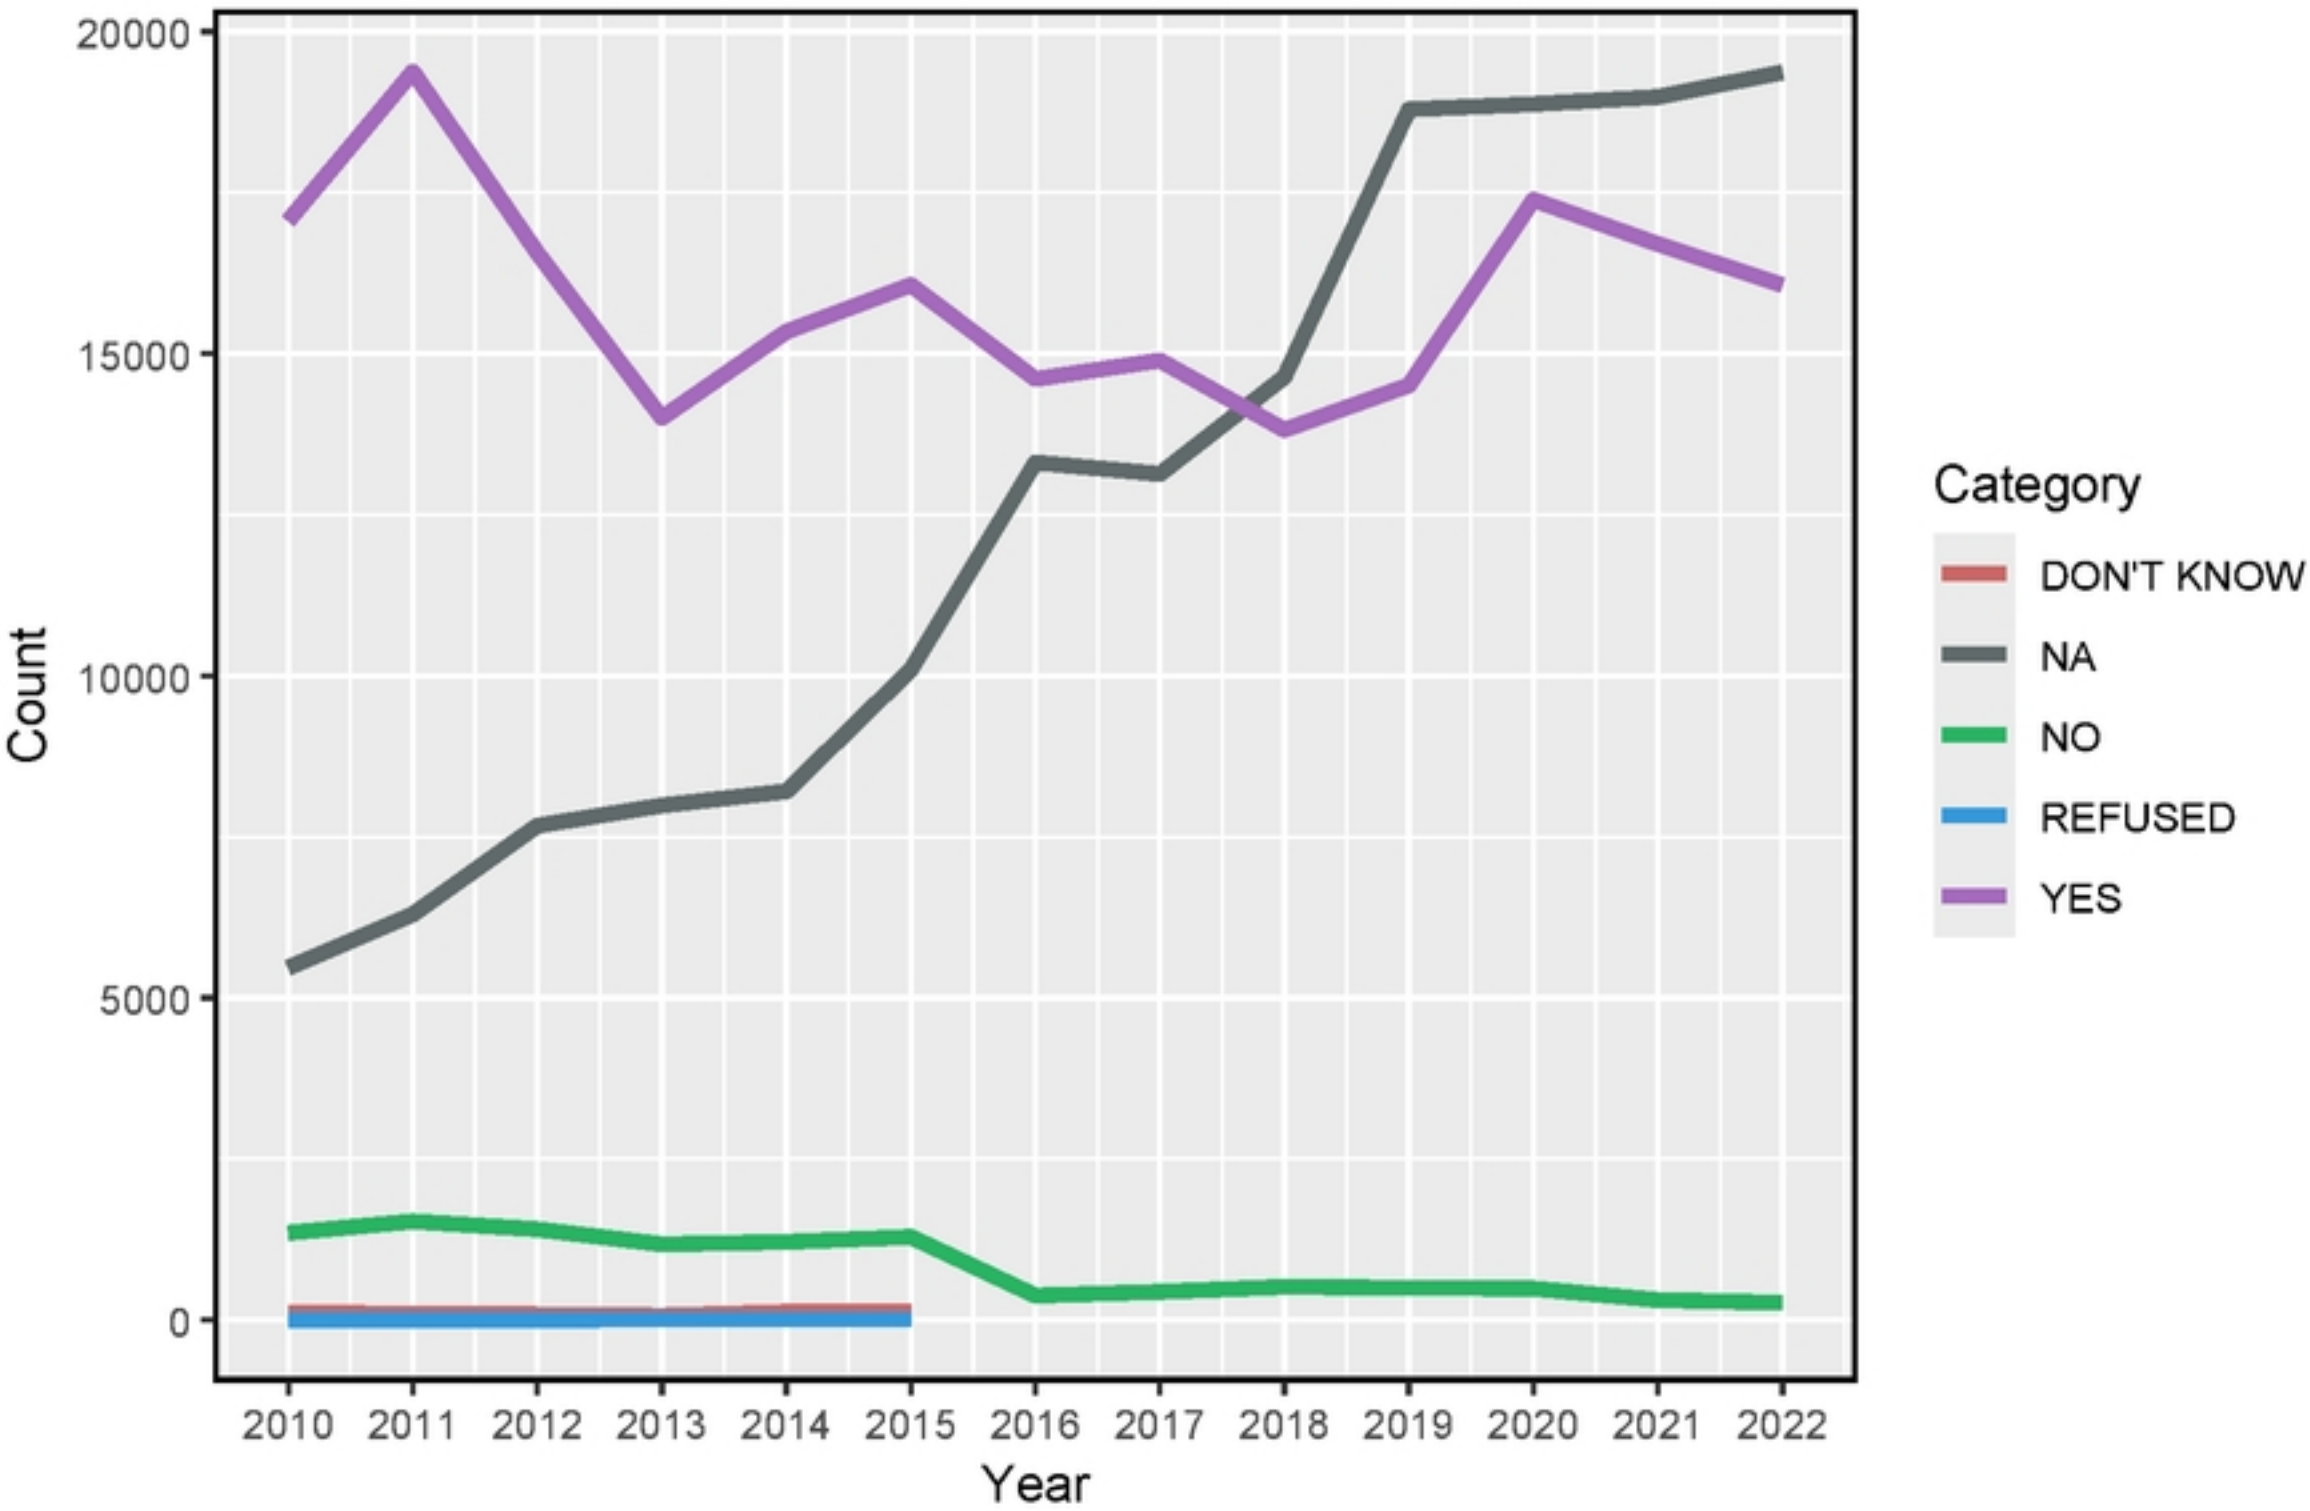

Figure 5



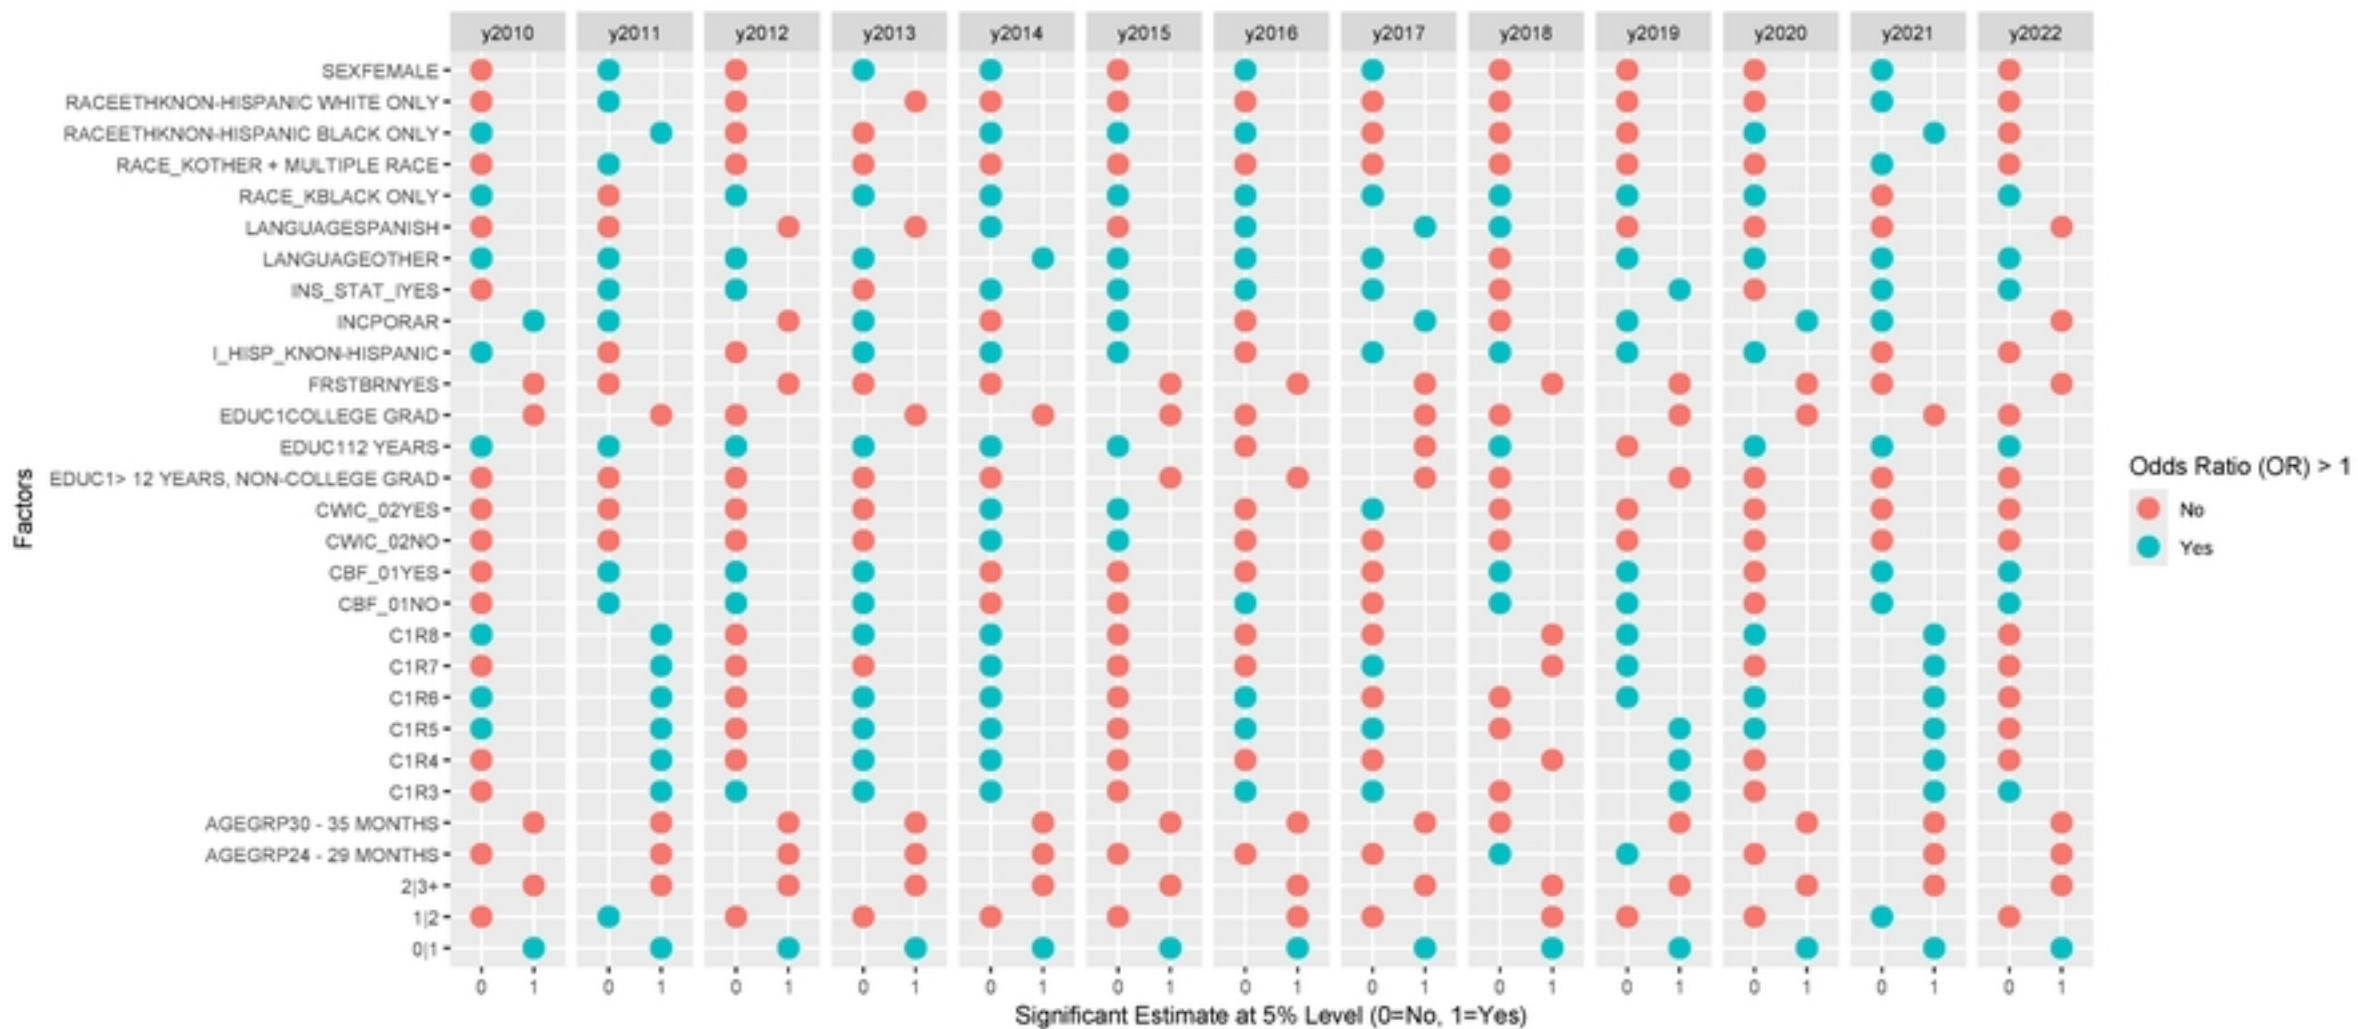

Figure 6
